# Supplementary material for: Computer-Aided Designing Peptide Inhibitors of Human Hematopoietic Prostaglandin D2 Synthase Combined Molecular Docking and Molecular Dynamics Simulation
Source: MDPI journal article supplement (doi:10.3390/molecules28155933), 2023-08-07
Supplement: s1 [file s1]

## Command line for Rosetta and Gromacs

---

### **##Rosetta command line for protein Relax**

#### **##First round**

```
relax.mpi.linuxgccrelease -s input_pdb.pdb -relax:constrain_relax_to_start_coords -ramp_constraints false -  
relax:coord_constrain_sidechains -nstruct 50 -ex1 -ex2 -use_input_sc -flip_HNQ -no_optH false
```

#### **##Second round**

```
relax.mpi.linuxgccrelease -s 1.pdb -nstruct 50 -ex1 -ex2 -use_input_sc -flip_HNQ -no_optH false  
-relax:cartesian -score:weights ref2015_cart -crystal_refine
```

---

### **##Python script for generating peptides**

```
import random  
import os  
def seq_gen(generate_number=3,mers=5):  
  
    residues_list = ['A', 'G', 'D', 'N', 'F', 'P', 'Q', 'C', 'E', 'H', 'I', 'K', 'L', 'M', 'R', 'S', 'T', 'V', 'W', 'Y']  
    for i in range(generate_number):  
        a = (random.choices(residues_list,k=mers))  
        seq = ""  
        seq = seq.join(a)  
  
        if not os.path.exists("%s"%seq):  
            os.mkdir("%s"%seq)  
        f = open("%s/buildpep.sh"%seq,'w')  
        f.write('BuildPeptide.mpi.linuxgccrelease -in:file:fasta %s/1.fasta -out:file:o %s/1.pdb'%(seq,seq))  
        f.close()  
        f = open("%s/1.fasta"%seq,'w')  
        f.write("%s"%seq)  
        f.close()  
        os.system('bash %s/buildpep.sh'%seq)
```

```
seq_gen()
```

---

### **##Accommodating peptide into receptor and performing docking**

```
import os  
path = os.getcwd() + '/1'  
pep = os.listdir(path)  
list = []  
for i in pep:  
    if len(i)>2:  
        list.append(i)  
for i in list:  
    os.system('cp 1.py 1.sh editconf.sh protein.pdb run.xml %s/%s'%(path,i))  
cpu_cores = 70  
def multi_run(cores=cpu_cores):  
    a = int(len(list)/cores)  
  
    for i in range(cores):  
        for k in range(a+1):  
            try:  
                f = open('run%s.sh'%str(i),'a+')  
                f.write('\n cd %s/%s\n'%(path,list[k+i*(a+1)]))  
                f.write('bash editconf.sh')  
                f.close()  
            except:  
                pass  
multi_run()  
f=open('run.sh','a+')  
for i in range(cpu_cores):  
    f.write('nohup bash run%s.sh &\n' % str(i))  
f.close()
```

---

### **##Rosetta command line for peptide conformation optimization**

```
rosetta_scripts.mpi.linuxgccrelease -s 1.pdb -parser:protocol run.xml -in:file:fullatom -ignore_unrecognized_res -ex1 -ex2 -  
overwrite -restore_talaris_behavior
```

---

### **##Gromacs command line for peptide conformation optimization**

```
gmx_mpi editconf -f 1.pdb -center coord_x coord_y coord_z -o ligo.pdb
```

---

### **##Python script for renaming protein chain**

```
import sys  
pdbdata = open('ligo.pdb','r').readlines()  
chain = 'B'  
output = open('ligo.pdb','w')  
for line in pdbdata:
```

---

---

```
if line[0:4] == 'ATOM':
    #print(line.replace('\n',''))
    try:
        newline = '%s%s%s'%(line[0:21],chain,line[22:])
        output.write(newline)
    except:
        print('bad')
        #output.write(line)
```

---

#### **##Rosetta script for peptide conformation optimization**

```
<ROSETTASCRIPITS>
  <SCOREFXNS>
    <ScoreFunction name="r2014" weights="talaris2014_cart"/>
  </SCOREFXNS>

  <RESIDUE_SELECTORS>
</RESIDUE_SELECTORS>
  <TASKOPERATIONS>
</TASKOPERATIONS>

  <FILTERS>
</FILTERS>

  <MOVERS>
    <MinMover name="minimize" scorefxn="r2014" chi="1" bb="1" tolerance="0.0000000001" max_iter="1000000" />
    <CartesianMD name="MD" scorefxn="r2014" nstep="100000" temp="200" premin="500" />
  </MOVERS>
  <APPLY_TO_POSE>
</APPLY_TO_POSE>
  <PROTOCOLS>
    <Add mover_name="minimize"/>
    <Add mover_name="MD"/>
  </PROTOCOLS>
  <OUTPUT />
</ROSETTASCRIPITS>
```

---

#### **##Rosetta command line for molecular docking**

```
rosetta_scripts.mpi.linuxgccrelease -s 1.pdb -parser:protocol pep_refine.xml -in:file:fullatom -ignore_unrecognized_res -ex1
-ex2 -overwrite -nstruct 100
```

---

#### **##Rosetta script for molecular docking**

```
<ROSETTASCRIPITS>
  <SCOREFXNS>
    <ScoreFunction name="r2015" weights="ref2015" />
  </SCOREFXNS>

  <RESIDUE_SELECTORS>
</RESIDUE_SELECTORS>
  <TASKOPERATIONS>
    <RestrictToRepacking name="no_design" />
  </TASKOPERATIONS>
  <FILTERS>
</FILTERS>

  <MOVERS>
    <FlexPepDock name="dock" pep_refine="1" />
    <InterfaceAnalyzerMover name="dg" scorefxn="r2015" packstat="1" pack_input="0" jump="1" tracer="0"
use_jobname="1" resfile="0" />
    <FastRelax name="fastrelax" scorefxn="r2015" task_operations="no_design"
relaxscript="InterfaceRelax2019" >
      <MoveMap name="only_move_protein" >
        <Chain number="1" chi="1" bb="1" />
      </MoveMap>
    </FastRelax>
    <MinMover name="min_mover" scorefxn="r2015" tolerance="0.000001" bb="1" chi="1" jump="1"
max_iter="5000" />
  </MOVERS>
  <APPLY_TO_POSE>
</APPLY_TO_POSE>
  <PROTOCOLS>
    <Add mover="dock" />
    <Add mover="min_mover"/>
    <Add mover="fastrelax" />
    <Add mover="dg" />
  </PROTOCOLS>
```

---

---

<OUTPUT />  
</ROSETTASCRIPTS>

---

Step by step validating Rosetta script:

Step 1: Accommodating peptide into the active center of protein receptor:

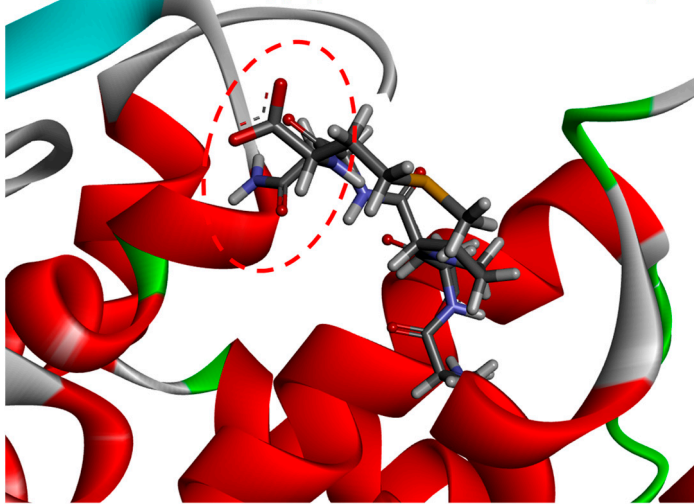

Step 2: Rosetta script only contain FlexPepDock to perform peptide refine:

The script and command line as below:

```
<ROSETTASCRIPTS>
  <SCOREFXNS>
    <ScoreFunction name="r2015" weights="ref2015" />
  </SCOREFXNS>
  <RESIDUE_SELECTORS>
  </RESIDUE_SELECTORS>
  <TASKOPERATIONS>
    <RestrictToRepacking name="no_design" />
  </TASKOPERATIONS>
  <FILTERS>
  </FILTERS>
  <MOVERS>
    <FlexPepDock name="dock" pep_refine="1" />
    <InterfaceAnalyzerMover name="dg" scorefxn="r2015" packstat="1" pack_input="0" jump="1" tracer="0" use_jobname="1" resfile="0" />
    <FastRelax name="fastrelax" scorefxn="r2015" task_operations="no_design" relaxscript="InterfaceRelax2015" />
    <MoveMap name="only_move_protein" />
    <Chain number="1" chi="1" bb="1" />
    </MoveMap>
    <FastRelax>
    <MinMover name="min_mover" scorefxn="r2015" tolerance="0.000001" bb="1" chi="1" jump="1" max_iter="5000" />
    </FastRelax>
  </MOVERS>
  <APPLY_TO_POSE>
  </APPLY_TO_POSE>
  <PROTOCOLS>
    <Add mover="dock" />
  </PROTOCOLS>
  <OUTPUT />
</ROSETTASCRIPTS>
```

```
rosetta_scripts.mpi.linuxgccrelease -s 1.pdb -parser:protocol pep_refine.xml -in:file:fullatom -ignore_unrecognized_res -ex1 -ex2 -overwrite
```

Resulted refined peptide steric location:

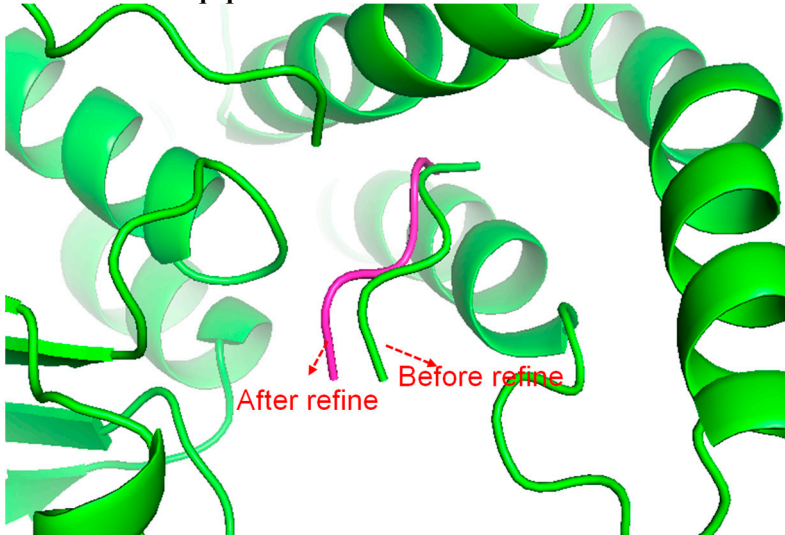

Step 3: Rosetta script only contain Minmover to perform whole structure refine:

The script and command line as below:

```

<ROSETTASCRIPTS>
  <SCOREFXNS>
    <ScoreFunction name="r2015" weights="ref2015" />
  </SCOREFXNS>

  <RESIDUE_SELECTORS>
  </RESIDUE_SELECTORS>
  <TASKOPERATIONS>
    <RestrictToRepacking name="no_design" />
  </TASKOPERATIONS>
  <FILTERS>
  </FILTERS>

  <MOVERS>
    <FlexPepDock name="dock" pep_refine="1" />
    <InterfaceAnalyzerMover name="dg" scorefxn="r2015" packstat="1" pack_input="0" jump="1" tracer="0" use_jobname="1" resfile="0" />
    <FastRelax name="fastrelax" scorefxn="r2015" task_operations="no_design" relaxscript="InterfaceRelax2019" >
      <MoveMap name="only_move_protein" >
        <Chain number="1" chi="1" bb="1" />
      </MoveMap>
    </FastRelax>
    <MinMover name="min_mover" scorefxn="r2015" tolerance="0.000001" bb="1" chi="1" jump="1" max_iter="5000" />
  </MOVERS>
  <APPLY_TO_POSE>
  </APPLY_TO_POSE>
  <PROTOCOLS>

    <Add mover="min_mover"/>

  </PROTOCOLS>
  <OUTPUT />
</ROSETTASCRIPTS>

```

```
rosetta_scripts.mpi.linuxgccrelease -s 1.pdb -parser:protocol pep_refine.xml -in:file:fullatom -ignore_unrecognized_res -ex1 -ex2 -overwrite
```

Resulted overall structure compared with native structure:

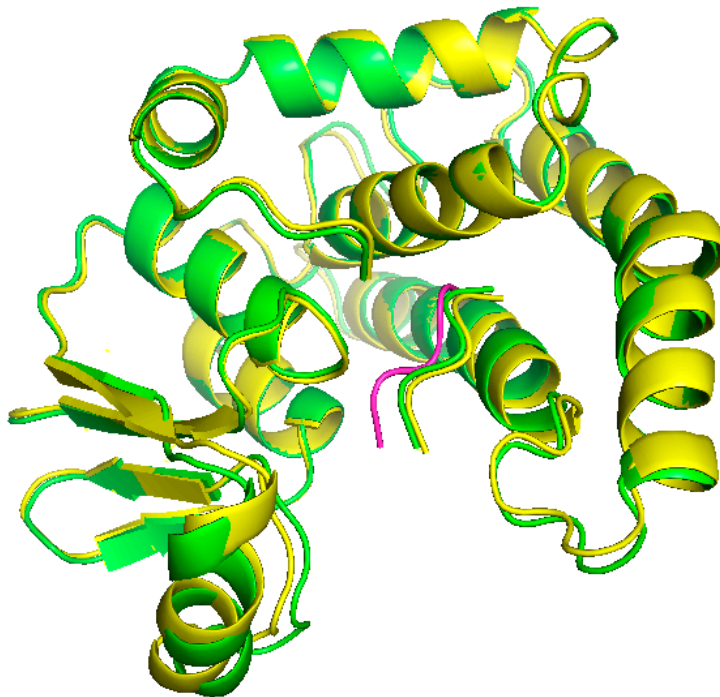

Protein receptor without Minmover for structural refine in green, protein and peptide after Minmover refine in yellow, RMSD = 0.455 Å

Step 4: Rosetta script only contain Fastrelax to perform whole structure refine and repack:

The script and command line as below:

```

<ROSETTASCRIPTS>
  <SCOREFXNS>
    <ScoreFunction name="r2015" weights="ref2015" />
  </SCOREFXNS>

  <RESIDUE_SELECTORS>
  </RESIDUE_SELECTORS>
  <TASKOPERATIONS>
    <RestrictToRepacking name="no_design" />
  </TASKOPERATIONS>
  <FILTERS>
  </FILTERS>

  <MOVERS>
    <FlexPepDock name="dock" pep_refine="1" />
    <InterfaceAnalyzerMover name="dg" scorefxn="r2015" packstat="1" pack_input="0" jump="1" tracer="0" use_jobname="1" resfile="0" />
    <FastRelax name="fastrelax" scorefxn="r2015" task_operations="no_design" relaxscript="InterfaceRelax2019" >
      <MoveMap name="only_move_protein" >
        <Chain number="1" chi="1" bb="1" />
      </MoveMap>
    </FastRelax>
    <MinMover name="min_mover" scorefxn="r2015" tolerance="0.000001" bb="1" chi="1" jump="1" max_iter="5000" />
  </MOVERS>
  <APPLY_TO_POSE>
  </APPLY_TO_POSE>
  <PROTOCOLS>

    <Add mover="fastrelax" />

  </PROTOCOLS>
  <OUTPUT />
</ROSETTASCRIPTS>

```

```
rosetta_scripts.mpi.linuxgccrelease -s 1.pdb -parser:protocol pep_refine.xml -in:file:fullatom -ignore_unrecognized_res -ex1 -ex2 -overwrite
```

**Resulted overall structure compared with native structure:**

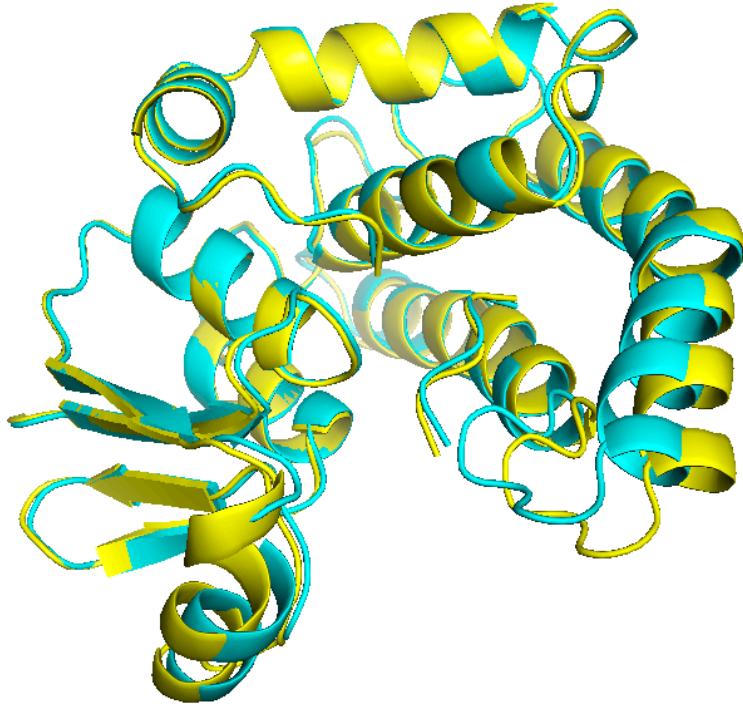

**Overall structure without Fastrelax in yellow, overall structure after Fastrelax refine in cyan,  
RMSD = 0.566 Å**
